# Supplementary material for: Ionic Peltier effect in Li-ion electrolytes
Source: Royal Society of Chemistry journal article supplement (doi:10.1039/d3cp05998g), 2024-01-01
Supplement: d3cp05998g1.pdf [file d3cp05998g1.pdf]

1

## 2 **Supporting Information for**

### 3 **Ionic Peltier Effect in Li-Ion Electrolytes**

4 **Zhe Cheng, Yu-Ju Huang, Benjamin Zahiri, Patrick Kwon, Paul V. Braun, David G. Cahill**

5 E-mail: d-cahill@illinois.edu

#### 6 **This PDF file includes:**

7 Figs. S1 to S8

8 Tables S1 to S7

9 SI References

## 10 Heading

11 **Note for Fig. S5.** The electrode potential temperature coefficients of closely related liquid electrolytes (LiTFSI-DOL-DME and  
12 LiPF<sub>6</sub>-EC-DEC) were obtained by Wang and co-workers (1) by imposing a temperature difference between two electrodes  
13 and measuring the resulting open circuit voltage. The electrode potential temperature coefficients are equivalent to the ionic  
14 Seebeck coefficients of the cell. We use the Onsager relation to calculate the corresponding ionic Peltier coefficient from the  
15 data of Ref. (1) and compare the measurements of Ref. (1) to our measurements in Fig. S5.

16 **Determination of thermal conductivity of composite by effective medium theory.** For a separator of randomly-oriented glass  
17 fibers with volume fraction  $f$  and thermal conductivity  $\Lambda_g$  embedded in a liquid electrolyte matrix with thermal conductivity  
18  $\Lambda_m$ , the analysis of Ref. (2) gives the following effective medium thermal conductivity  $\Lambda^*$  for the separator/liquid-electrolyte  
19 composite:

$$20 \quad \beta_1 = 2 \frac{\Lambda_g - \Lambda_m}{\Lambda_g + \Lambda_m} \quad [S1]$$

$$21 \quad \beta_2 = \frac{\Lambda_g - \Lambda_m}{\Lambda_m} \quad [S2]$$

$$22 \quad \Lambda^* = \Lambda_m \frac{3 + f(\beta_1 + \beta_2)}{3 - f\beta_1} \quad [S3]$$

23  
24  
25 For typical combinations of  $\Lambda_g$ ,  $\Lambda_m$ , and  $f$  that we encountered in our work, the prediction of Eq. S3 is approximately 10%  
26 larger than the prediction of the Landauer symmetric theory, and nearly identical to the average of the Hashin-Shtrikman  
27 upper and lower bounds on the conductivity of an isotropic composite.

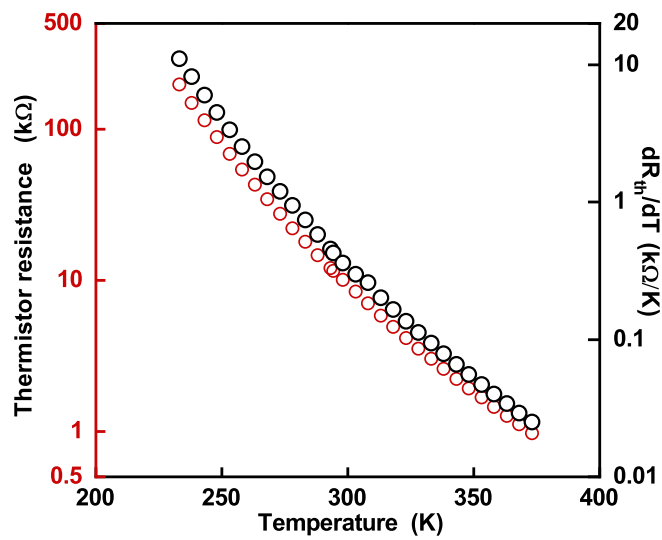

**Fig. S1.** Temperature dependent electrical resistance ( $R_{th}$ ) and  $dR_{th}/dT$  of thermistors. The red circles are data for  $R_{th}(T)$  provided by the manufacturer of the thermistor. The black circles are calculated values of  $dR_{th}/dT$  obtained by taking the derivative of a polynomial fit to  $R_{th}$ .

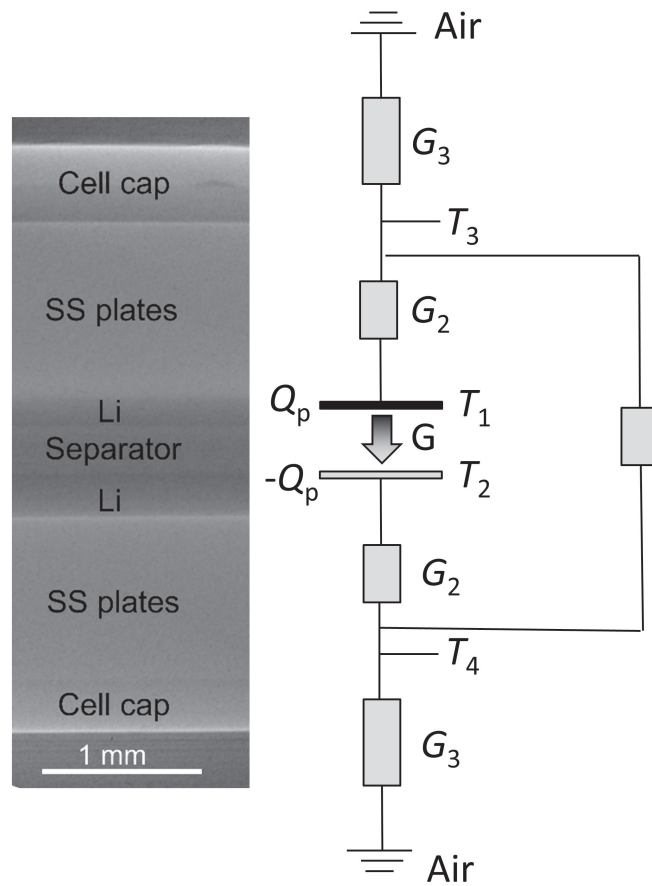

**Fig. S2.** The left panel a the cross-sectional image of the central section of a coin cell from x-ray computed tomography (CT). The right panel is the schematic of the thermal resistance network of the coin cell. The thermal conductance  $G$  of the separator/liquid-electrolyte composite is much larger than  $G_3$ . The heat conduction through the rubber O-ring sandwiched by the cell caps (Grubber) is also included in the thermal resistance network.

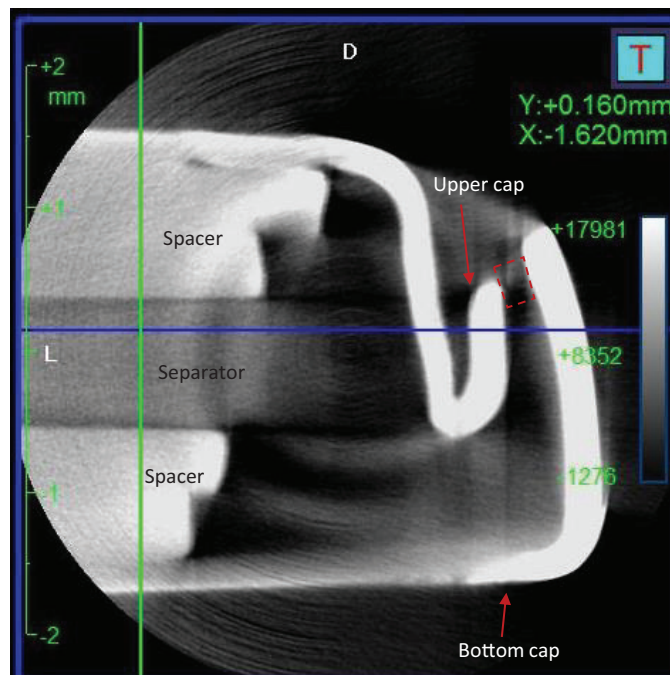

**Fig. S3.** Cross-sectional image of the edge of the coin cell from x-ray computed tomography (CT). The small rectangle outlined in a red dash line shows where the rubber O-ring rubber. The green and blue lines are the location of the mouse and the green numbers show the coordinates. The contact area of the two caps which sandwich a layer of the rubber sealing O-ring is approximately 10% of the separator area of the coin cell. The estimated thermal conductance of the O-ring contact between the upper and bottom cap is  $15 \text{ mW K}^{-1}$ , approximately 10% of the thermal conductance of the separator/liquid-electrolyte composite.

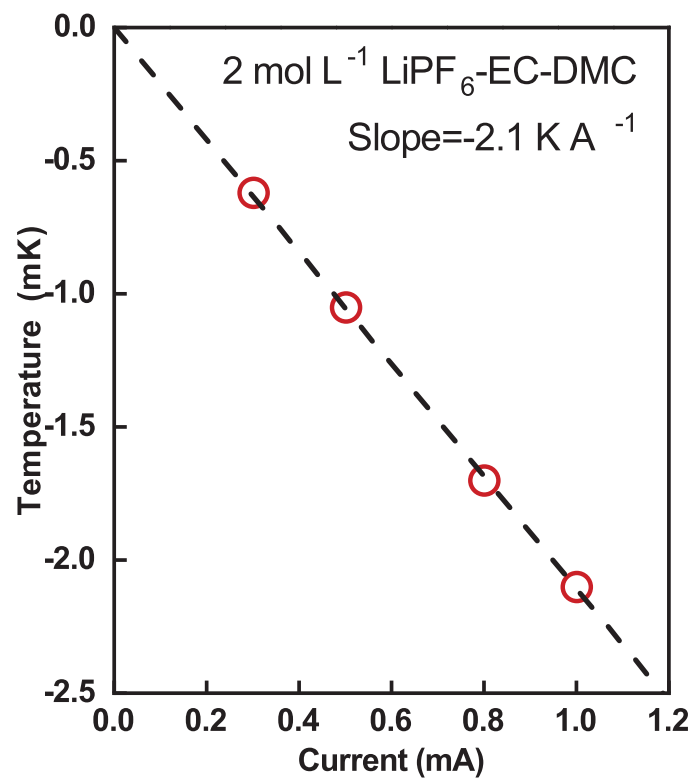

**Fig. S4.** Red circles are measurements of the temperature difference responses of a coin cell with 2 mol L<sup>-1</sup> LiPF<sub>6</sub>-EC-DMC liquid electrolyte as a function of applied currents. The fit to a linear relationship with zero intercept is depicted by the dashed line. The slope of this line is -2.1 K A<sup>-1</sup>.

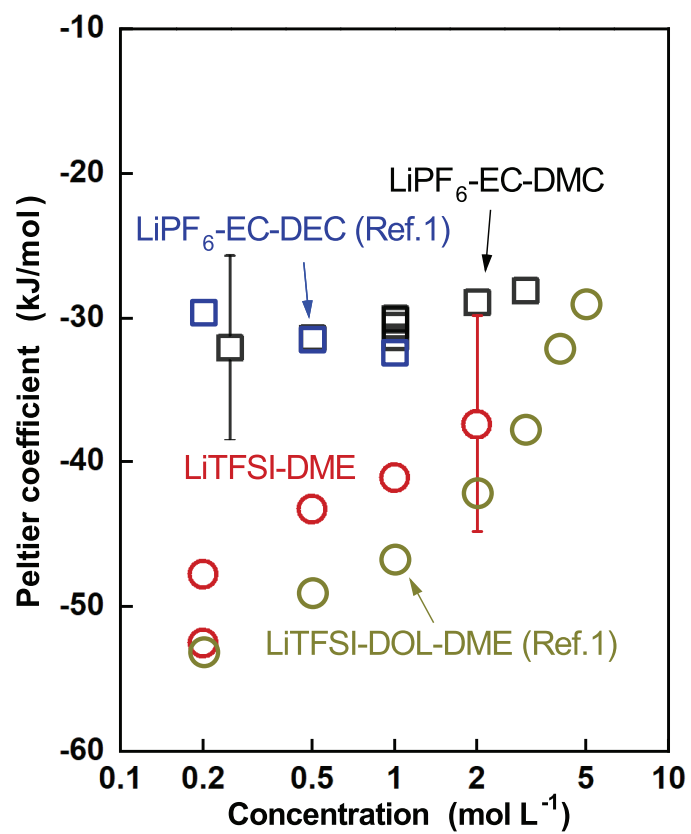

**Fig. S5.** The Peltier coefficients of liquid electrolytes measured in this work (red circles, LiTFSI-DME and black squares, LiPF<sub>6</sub>-EC-DMC) are compared with the Peltier coefficients calculated from applying the Onsager relationship to electrode potential temperature coefficient of closely related liquid electrolytes (green circles, LiTFSI-DOL-DME and blue squares, LiPF<sub>6</sub>-EC-DEC) obtained by imposing a temperature difference and measuring the voltage difference(1).

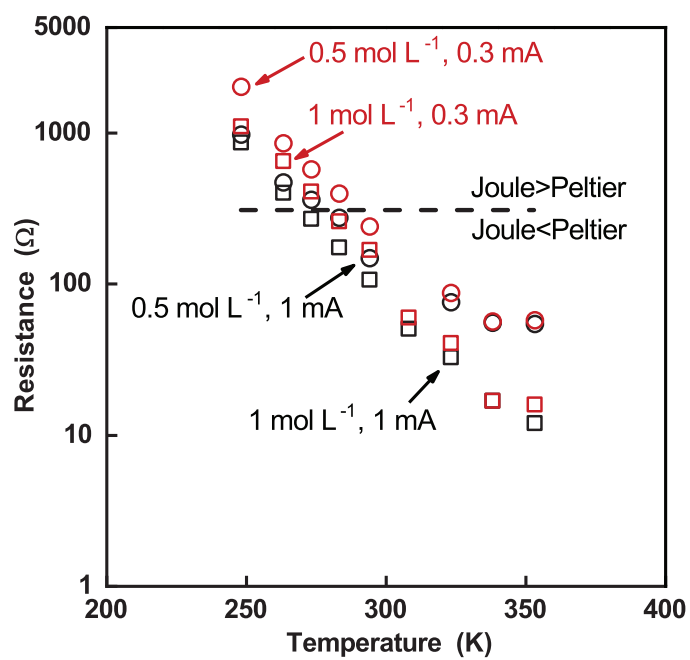

Fig. S6. Temperature dependent resistances of symmetric coin cells with 0.5 mol L<sup>-1</sup> and 1 mol L<sup>-1</sup> LiPF<sub>6</sub>-EC-DMC liquid electrolytes. The dash line depicts the resistance at which the ionic Peltier heat is approximately equal to the Joule heat.



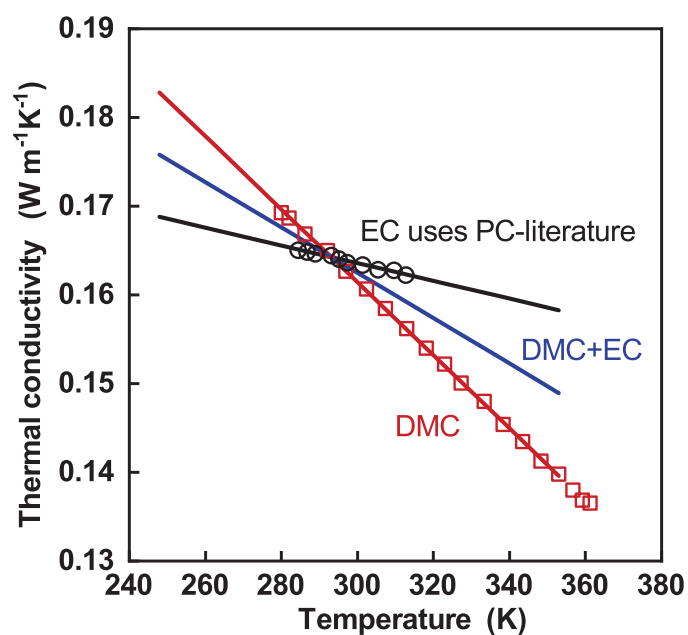

**Fig. S7.** Temperature dependence of the thermal conductivity of solvents in the electrolytes. The symbols are experimental thermal conductivity data from the literature (3–5). We use linear extrapolations to obtain data points which are not available for a specific temperature. The thermal conductivity data of ethylene carbonate (EC) is not available in the literature and we therefore use data of the structurally-similar propylene carbonate (PC). DMC is dimethyl carbonate. The temperature-dependent thermal conductivity of EC and DMC are used in Table S1 to S7 for the calculation of Peltier coefficient.

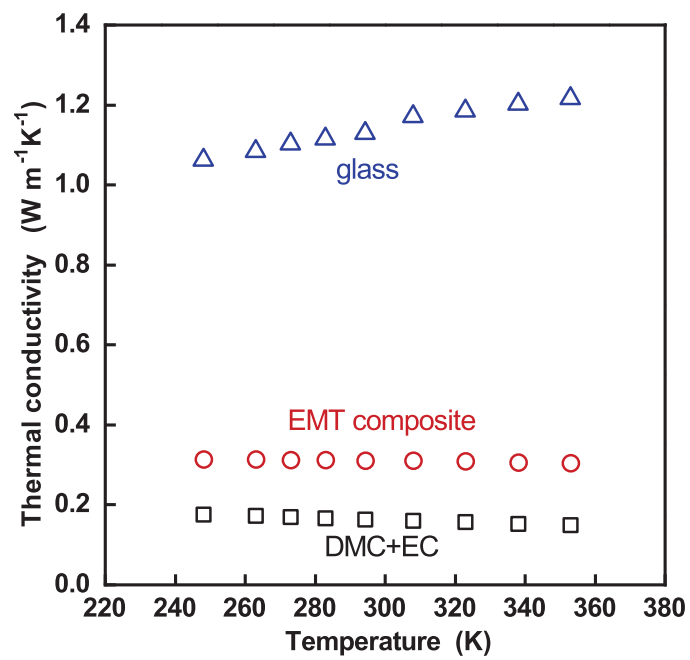

**Fig. S8.** Temperature-dependent thermal conductivity of the separator/liquid-electrolyte composite calculated by effective medium theory (EMT) using equation 23 of Ref. (2). See note on page 2 of SI for the calculation of the thermal conductivity of the composite. The thermal conductivity of borosilicate glass fiber is taken from the literature (6).

**Table S1. Coin cell fabrication, calculated separator/liquid-electrolyte thermal conductivity ( $\Lambda^*$  defined by Eq. S3), and Peltier coefficient at 294.3 K. Slope is the slope of the temperature difference response as a function of applied current, as shown in Fig. S4.**

| Electrolyte                     | Salt concentration<br>(mol L <sup>-1</sup> ) | Amount of<br>separator layers | Separator<br>volume<br>(mm <sup>3</sup> ) | Composite<br>thickness<br>( $\mu$ m) | Composite<br>volume<br>(mm <sup>3</sup> ) | Separator volume<br>fraction $f$ | Composite $\Lambda^*$<br>(W/(m <sup>2</sup> K)) | Conductance<br>$G$<br>(mW/K) | Slope<br>(mK/mA) | Peltier<br>coefficient $\Pi$<br>(kJ/mol) |
|---------------------------------|----------------------------------------------|-------------------------------|-------------------------------------------|--------------------------------------|-------------------------------------------|----------------------------------|-------------------------------------------------|------------------------------|------------------|------------------------------------------|
| LiTFSI-DME                      | 0.2                                          | 2                             | 21.1                                      | 308                                  | 61.9                                      | 0.34                             | 0.35                                            | 236                          | -2.31            | -52.5                                    |
| LiTFSI-DME                      | 0.2                                          | 2                             | 21.1                                      | 350                                  | 70.4                                      | 0.3                              | 0.32                                            | 190                          | -2.6             | -47.8                                    |
| LiTFSI-DME                      | 0.5                                          | 1                             | 10.4                                      | 304                                  | 61.1                                      | 0.17                             | 0.24                                            | 164                          | -2.74            | -43.3                                    |
| LiTFSI-DME                      | 1                                            | 1                             | 10.4                                      | 277                                  | 55.7                                      | 0.19                             | 0.25                                            | 187                          | -2.28            | -41.1                                    |
| LiTFSI-DME                      | 2                                            | 1                             | 10.4                                      | 365                                  | 73.4                                      | 0.14                             | 0.22                                            | 127                          | -3.05            | -37.3                                    |
| LiPF <sub>6</sub> -DMC          | 1                                            | 2                             | 21.1                                      | 475                                  | 95.5                                      | 0.22                             | 0.28                                            | 126                          | -2.6             | -31.6                                    |
| LiPF <sub>6</sub> -DMC          | 1                                            | 2                             | 21.1                                      | 505                                  | 102                                       | 0.21                             | 0.28                                            | 115                          | -2.77            | -30.7                                    |
| LiPF <sub>6</sub> -EC-DMC       | 0.25                                         | 2                             | 20.8                                      | 408                                  | 82.0                                      | 0.25                             | 0.30                                            | 157                          | -2.11            | -32.0                                    |
| LiPF <sub>6</sub> -EC-DMC       | 0.5                                          | 2                             | 20.8                                      | 432                                  | 86.9                                      | 0.24                             | 0.30                                            | 144                          | -2.26            | -31.4                                    |
| LiPF <sub>6</sub> -EC-DMC       | 1                                            | 2                             | 20.8                                      | 394                                  | 79.2                                      | 0.26                             | 0.31                                            | 166                          | -1.88            | -30.1                                    |
| LiPF <sub>6</sub> -EC-DMC       | 1                                            | 2                             | 21.1                                      | 485                                  | 97.5                                      | 0.22                             | 0.28                                            | 122                          | -2.64            | -31.1                                    |
| LiPF <sub>6</sub> -EC-DMC (LCO) | 1                                            | 2                             | 20.8                                      | 585                                  | 118                                       | 0.18                             | 0.26                                            | 93                           | -3.41            | -30.5                                    |
| LiPF <sub>6</sub> -EC-DMC       | 2                                            | 1                             | 10.4                                      | 355                                  | 71.4                                      | 0.15                             | 0.24                                            | 142                          | -2.11            | -28.9                                    |
| LiPF <sub>6</sub> -EC-DMC       | 3                                            | 2                             | 21.1                                      | 525                                  | 106                                       | 0.2                              | 0.27                                            | 109                          | -2.68            | -28.1                                    |

**Table S2. Glass fiber thermal conductivity, electrolyte thermal conductivity,  $\beta_1$ , and  $\beta_2$  at 294.3 K. ( $\beta_1$  and  $\beta_2$  are defined by Eq. S1 and S2, respectively.)**

| Electrolyte               | Glass fiber $\Lambda_g$<br>(W/(m <sup>2</sup> K)) | Electrolyte $\Lambda_m$<br>(W/(m <sup>2</sup> K)) | $\beta_1$ | $\beta_2$ |
|---------------------------|---------------------------------------------------|---------------------------------------------------|-----------|-----------|
| LiTFSI-DME                | 1.13                                              | 0.15                                              | 1.54      | 6.67      |
| LiPF <sub>6</sub> -EC-DMC | 1.13                                              | 0.16                                              | 1.49      | 5.89      |

**Table S3. Temperature dependent ionic Peltier coefficients of 1 mol L<sup>-1</sup> LiPF<sub>6</sub>-EC-DMC. ( $\beta_1$  and  $\beta_2$  are defined by Eq. S1 and S2, respectively.  $\Lambda^*$  is defined by Eq. S3.)**

| Temperature | Glass fiber $\Lambda_g$ | Electrolyte $\Lambda_m$ | $\beta_1$ | $\beta_2$ | Composite $\Lambda^*$ | Conductance $G$<br>(mW/K) | Slope<br>(mK/mA) | Peltier<br>coefficient $\Pi$<br>(kJ/mol) |
|-------------|-------------------------|-------------------------|-----------|-----------|-----------------------|---------------------------|------------------|------------------------------------------|
| 248         | 1.06                    | 0.18                    | 1.43      | 5.04      | 0.31                  | 168                       | -1.73            | -28.1                                    |
| 263         | 1.08                    | 0.17                    | 1.45      | 5.30      | 0.31                  | 167                       | -1.79            | -29.0                                    |
| 273         | 1.10                    | 0.17                    | 1.47      | 5.51      | 0.31                  | 167                       | -1.74            | -28.1                                    |
| 283         | 1.12                    | 0.17                    | 1.48      | 5.69      | 0.31                  | 166                       | -1.73            | -27.8                                    |
| 294.3       | 1.13                    | 0.16                    | 1.49      | 5.89      | 0.31                  | 166                       | -1.88            | -30.1                                    |
| 308         | 1.17                    | 0.16                    | 1.52      | 6.30      | 0.31                  | 166                       | -1.87            | -30.0                                    |
| 323         | 1.19                    | 0.16                    | 1.53      | 6.57      | 0.31                  | 165                       | -2.08            | -33.1                                    |
| 338         | 1.20                    | 0.15                    | 1.55      | 6.87      | 0.31                  | 164                       | -2.31            | -36.6                                    |
| 353         | 1.22                    | 0.15                    | 1.56      | 7.16      | 0.30                  | 162                       | -2.45            | -38.3                                    |

**Table S4. Temperature dependent ionic Peltier coefficients of 0.5 mol L<sup>-1</sup> LiPF<sub>6</sub>-EC-DMC (cell-1). ( $\beta_1$  and  $\beta_2$  are defined by Eq. S1 and S2, respectively.  $\Lambda^*$  is defined by Eq. S3.)**

| Temperature | Glass fiber $\Lambda_g$ | Electrolyte $\Lambda_m$ | $\beta_1$ | $\beta_2$ | Composite $\Lambda^*$ | Conductance $G$<br>(mW/K) | Slope<br>(mK/mA) | Peltier<br>coefficient $\Pi$<br>(kJ/mol) |
|-------------|-------------------------|-------------------------|-----------|-----------|-----------------------|---------------------------|------------------|------------------------------------------|
| 248         | 1.06                    | 0.18                    | 1.43      | 5.04      | 0.34                  | 208                       | -1.65            | -33.1                                    |
| 263         | 1.08                    | 0.17                    | 1.45      | 5.30      | 0.34                  | 207                       | -1.60            | -32.1                                    |
| 273         | 1.10                    | 0.17                    | 1.47      | 5.51      | 0.34                  | 207                       | -1.62            | -32.3                                    |
| 283         | 1.12                    | 0.17                    | 1.48      | 5.69      | 0.34                  | 207                       | -1.64            | -32.7                                    |
| 294.3       | 1.13                    | 0.16                    | 1.49      | 5.89      | 0.34                  | 206                       | -1.61            | -32.0                                    |
| 308         | 1.17                    | 0.16                    | 1.52      | 6.30      | 0.34                  | 207                       | -1.59            | -31.7                                    |
| 323         | 1.19                    | 0.16                    | 1.53      | 6.57      | 0.34                  | 206                       | -1.77            | -35.1                                    |
| 338         | 1.20                    | 0.15                    | 1.55      | 6.87      | 0.33                  | 205                       | -1.97            | -38.9                                    |
| 353         | 1.22                    | 0.15                    | 1.56      | 7.16      | 0.33                  | 203                       | -2.07            | -40.6                                    |

**Table S5. Temperature dependent ionic Peltier coefficients of 0.5 mol L<sup>-1</sup> LiPF6-EC-DMC (cell-2). Cell failed at  $T > 294.3$  K. ( $\beta_1$  and  $\beta_2$  are defined by Eq. S1 and S2, respectively.  $\Lambda^*$  is defined by Eq. S3.)**

| Temperature | Glass fiber $\Lambda_g$ | Electrolyte $\Lambda_m$ | $\beta_1$ | $\beta_2$ | Composite $\Lambda^*$ | Conductance $G$<br>(mW/K) | Slope<br>(mK/mA) | Peltier<br>coefficient $\Pi$<br>(kJ/mol) |
|-------------|-------------------------|-------------------------|-----------|-----------|-----------------------|---------------------------|------------------|------------------------------------------|
| 263         | 1.08                    | 0.17                    | 1.45      | 5.30      | 0.30                  | 146                       | -2.07            | -29.2                                    |
| 273         | 1.10                    | 0.17                    | 1.47      | 5.51      | 0.30                  | 145                       | -1.99            | -27.9                                    |
| 283         | 1.12                    | 0.17                    | 1.48      | 5.69      | 0.30                  | 145                       | -2.07            | -29.0                                    |
| 294.3       | 1.13                    | 0.16                    | 1.49      | 5.89      | 0.30                  | 144                       | -2.26            | -31.4                                    |

**Table S6. Temperature dependent ionic Peltier coefficients of 1 mol L<sup>-1</sup> LiPF<sub>6</sub>-DMC (cell-1). ( $\beta_1$  and  $\beta_2$  are defined by Eq. S1 and S2, respectively.  $\Lambda^*$  is defined by Eq. S3.)**

| Temperature | Glass fiber $\Lambda_g$ | Electrolyte $\Lambda_m$ | $\beta_1$ | $\beta_2$ | Composite $\Lambda^*$ | Conductance $G$<br>(mW/K) | Slope<br>(mK/mA) | Peltier<br>coefficient $\Pi$<br>(kJ/mol) |
|-------------|-------------------------|-------------------------|-----------|-----------|-----------------------|---------------------------|------------------|------------------------------------------|
| 283         | 1.12                    | 0.17                    | 1.48      | 5.63      | 0.29                  | 127                       | -2.65            | -32.6                                    |
| 295         | 1.13                    | 0.16                    | 1.49      | 5.90      | 0.28                  | 126                       | -2.6             | -31.6                                    |
| 308         | 1.17                    | 0.16                    | 1.52      | 6.41      | 0.28                  | 125                       | -2.76            | -33.3                                    |
| 323         | 1.19                    | 0.15                    | 1.55      | 6.80      | 0.28                  | 123                       | -2.99            | -35.4                                    |
| 338         | 1.20                    | 0.15                    | 1.57      | 7.24      | 0.27                  | 120                       | -3.06            | -35.5                                    |



**Table S7. Temperature dependent ionic Peltier coefficients of 1 mol L<sup>-1</sup> LiPF<sub>6</sub>-DMC (cell-2). ( $\beta_1$  and  $\beta_2$  are defined by Eq. S1 and S2, respectively.  $\Lambda^*$  is defined by Eq. S3.)**

| Temperature | Glass fiber $\Lambda_g$ | Electrolyte $\Lambda_m$ | $\beta_1$ | $\beta_2$ | Composite $\Lambda^*$ | Conductance $G$<br>(mW/K) | Slope<br>(mK/mA) | Peltier<br>coefficient $\Pi$<br>(kJ/mol) |
|-------------|-------------------------|-------------------------|-----------|-----------|-----------------------|---------------------------|------------------|------------------------------------------|
| 283.1       | 1.12                    | 0.17                    | 1.48      | 5.63      | 0.280                 | 116                       | -2.6             | -29.2                                    |
| 295         | 1.13                    | 0.16                    | 1.49      | 5.90      | 0.276                 | 115                       | -2.77            | -30.7                                    |
| 307.6       | 1.17                    | 0.16                    | 1.52      | 6.41      | 0.274                 | 114                       | -3.05            | -33.6                                    |
| 333.5       | 1.20                    | 0.15                    | 1.57      | 7.24      | 0.264                 | 110                       | -3.3             | -34.9                                    |

28 **References**

- 29 1. H Wang, et al., Correlating Li-ion solvation structures and electrode potential temperature coefficients. *J. Am. Chem. Soc.*  
30 **143**, 2264–2271 (2021).
- 31 2. CW Nan, R Birringer, DR Clarke, H Gleiter, Effective thermal conductivity of particulate composites with interfacial  
32 thermal resistance. *J. Appl. Phys.* **81**, 6692–6699 (1997).
- 33 3. X Jin, J Wu, Z Liu, J Pan, The thermal conductivity of dimethyl carbonate in the liquid phase. *Fluid Phase Equilibria*  
34 **220**, 37–40 (2004).
- 35 4. M Tuluszka, F Jaroszyk, M Portalski, Absolute measurement of the thermal conductivity of propylene carbonate by the ac  
36 transient hot-wire technique. *Int. J. Thermophys.* **12**, 791–800 (1991).
- 37 5. J Wu, H Zheng, X Qian, X Li, MJ Assael, Thermal conductivity of liquid 1, 2-dimethoxyethane from 243 K to 353 K at  
38 pressures up to 30 MPa. *Int. J. Thermophys.* **30**, 385–396 (2009).
- 39 6. DG Cahill, Thermal conductivity measurement from 30 to 750 K: the  $3\omega$  method. *Rev. Sci. Instruments* **61**, 802–808  
40 (1990).
